# Supplementary material
Source: ML conference proceedings conference paper supplement (https://www.ecva.net/papers/eccv_2020/papers_ECCV/html/123640154_ECCV_2020_paper.php)
Supplement: Supplementary file 2 [file 123640154-supp.zip]

Archive with 7 entries (6 files):
- 3162-supp/
- __MACOSX/._3162-supp
- 3162-supp/.DS_Store
- __MACOSX/3162-supp/._.DS_Store
- 3162-supp/3162-supp.pdf
- 3162-supp/3162-supp.mp4
- __MACOSX/3162-supp/._3162-supp.mp4
